# Supplementary material
Source: publisher figshare collection journal article supplement (https://aacr.figshare.com/articles/dataset/_/23905214)
Supplement: Supplementary file 1 [file 41911397]

**Supplemental Table 4.** List of dysregulated oncogenes, tumor suppressor genes, and fusion proteins in the presence or absence of gain(1q) based on the Cancer Gene Census

| <b>ID</b>       | <b>foldchange_NG</b> | <b>p-value</b> | <b>Adj p-value</b> | <b>Type</b>           |
|-----------------|----------------------|----------------|--------------------|-----------------------|
| <i>PRCC</i>     | 0.80168553           | 9.19E-52       | 5.22E-47           | fusion                |
| <i>SDHC</i>     | 0.69744872           | 1.54E-50       | 8.73E-46           | TSG                   |
| <i>ARNT</i>     | 0.68624267           | 2.63E-42       | 1.49E-37           | oncogene, TSG, fusion |
| <i>FH</i>       | 0.74648963           | 1.53E-41       | 8.66E-37           | TSG                   |
| <i>SETDB1</i>   | 0.52310858           | 7.40E-41       | 4.20E-36           | oncogene              |
| <i>CDC73</i>    | 0.59059437           | 1.34E-33       | 7.60E-29           | TSG                   |
| <i>TPM3</i>     | 0.66056273           | 2.81E-33       | 1.59E-28           | TSG, fusion           |
| <i>ELK4</i>     | 0.59937972           | 5.19E-32       | 2.95E-27           | oncogene, fusion      |
| <i>TPR</i>      | 0.5278823            | 1.29E-31       | 7.33E-27           | fusion                |
| <i>ABL2</i>     | 0.45081001           | 4.20E-27       | 2.38E-22           | oncogene, fusion      |
| <i>MDM4</i>     | 0.52063918           | 2.05E-22       | 1.16E-17           | oncogene              |
| <i>MUC1</i>     | 1.61826482           | 1.22E-19       | 6.92E-15           | fusion                |
| <i>MLLT11</i>   | 0.68500481           | 2.64E-19       | 1.50E-14           | fusion                |
| <i>BCL9</i>     | 0.57223808           | 8.81E-18       | 5.00E-13           | oncogene, fusion      |
| <i>TNFRSF14</i> | -0.50106349          | 1.04E-17       | 5.93E-13           | TSG                   |
| <i>NTRK1</i>    | 1.24713486           | 1.10E-16       | 6.24E-12           | oncogene, TSG, fusion |
| <i>TRIM33</i>   | -0.26268158          | 1.60E-10       | 9.07E-06           | TSG, fusion           |
| <i>ELF3</i>     | 0.68018824           | 4.56E-10       | 2.59E-05           | TSG                   |
| <i>BTG2</i>     | 0.52662376           | 1.60E-08       | 0.00090945         | TSG                   |
| <i>MYCL</i>     | -0.70559573          | 2.85E-08       | 0.0016155          | oncogene              |
| <i>DDR2</i>     | 0.49458475           | 3.85E-08       | 0.00218421         | oncogene              |
| <i>PDE4DIP</i>  | 0.27192444           | 1.89E-07       | 0.01072748         | fusion                |
| <i>RBM15</i>    | 0.22582288           | 2.13E-07       | 0.01206706         | fusion                |
| <i>LMNA</i>     | 0.70970518           | 4.85E-07       | 0.02755593         | fusion                |
| <i>RPL22</i>    | -0.26560667          | 5.17E-07       | 0.02934791         | TSG, fusion           |
